# Supplementary material for: Dielectric behaviour of plasma hydrogenated TiO2/cyanoethylated cellulose nanocomposites
Source: Royal Society of Chemistry journal article supplement (doi:10.1039/d2nr04680f), 2022-12-19
Supplement: d2nr04680f1.pdf [file d2nr04680f1.pdf]

## Dielectric behaviour of plasma hydrogenated TiO<sub>2</sub>/Cyanoethylated cellulose nanocomposites

Nadeesh M. Adassooriya,<sup>1</sup> Dilek Ozgit<sup>1</sup>, Sai G. Shivareddy,<sup>1</sup> Pritesh Hiralal,<sup>1</sup> Damayanthi yake<sup>2</sup>, Rachel A. Oliver<sup>3</sup> and Gehan A. J. Amaratunga<sup>1\*</sup>

### Supplementary Information

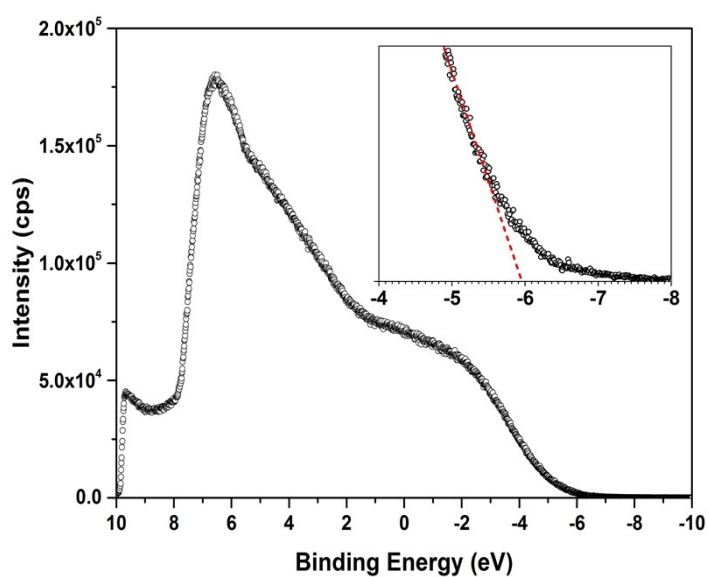

Figure S1 Ultra-violet Photoemission Spectra for H-TiO<sub>2</sub>

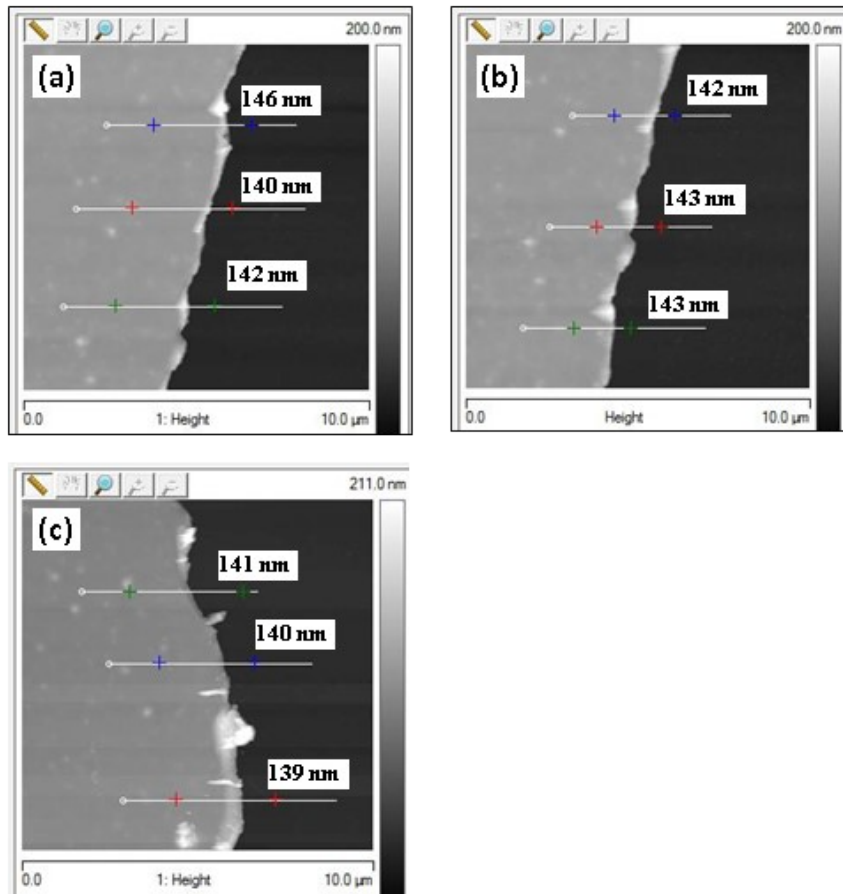

**Figure S2** Cross section view of (a) 10% (b) 20% and (c) 30% CRS-H-TiO<sub>2</sub> nanocomposites

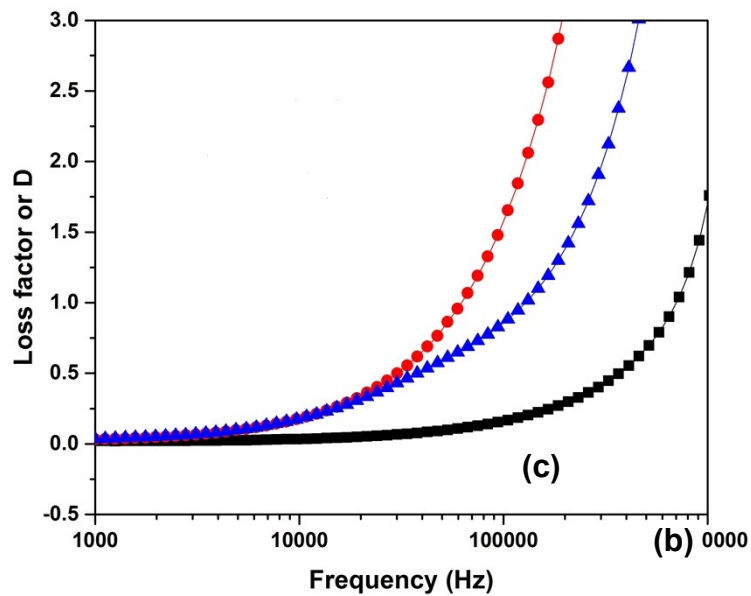

**Figure S3** Lost factors for CRS-H-TiO<sub>2</sub> nanocomposites with different H-TiO<sub>2</sub> loadings (a) 10%, (b) 20% and (c) 30%
